# Supplementary material for: On the role of VP3-PI3P interaction in birnavirus endosomal membrane targeting
Source: eLife journal article supplement (doi:10.7554/elife.97261), 2024-04-26
Supplement: fig1-data1 [file elife-97261-fig1-data1-v1.pdf]

**Figure 1 - Source Data 1.** Original membranes corresponding to Figure 1, panel A, B and G. In all the cases, the Page Ruler Plus Prestained Protein Ladder from Thermo Fisher Scientific (Product #26619) was used.

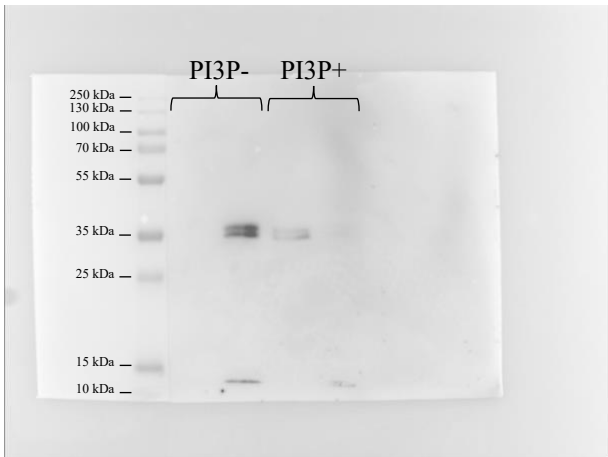

Panel A, His-2xFYVE

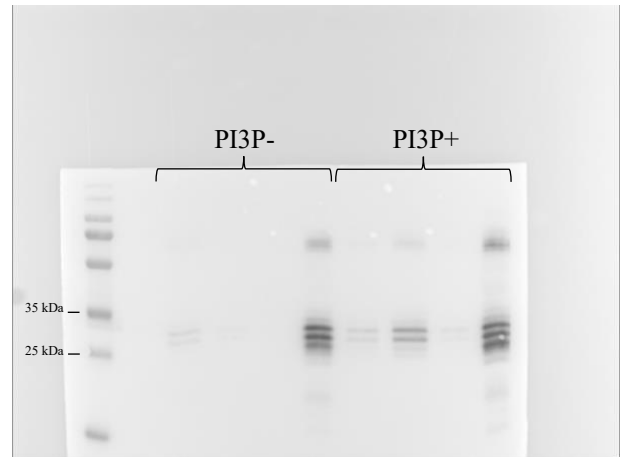

Panel A, His-VP3 FL

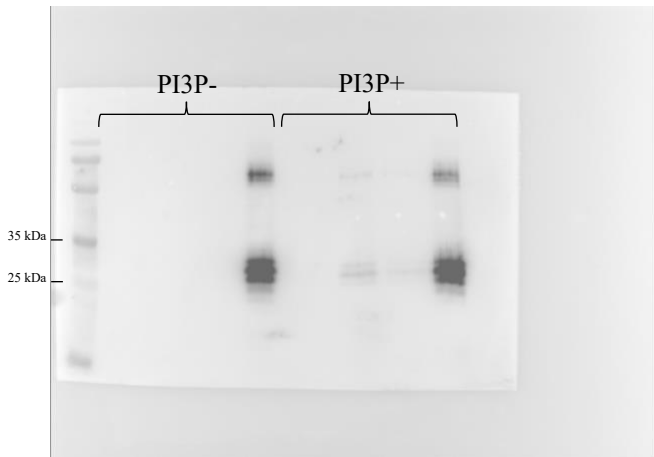

Panel G, His-VP3 FL

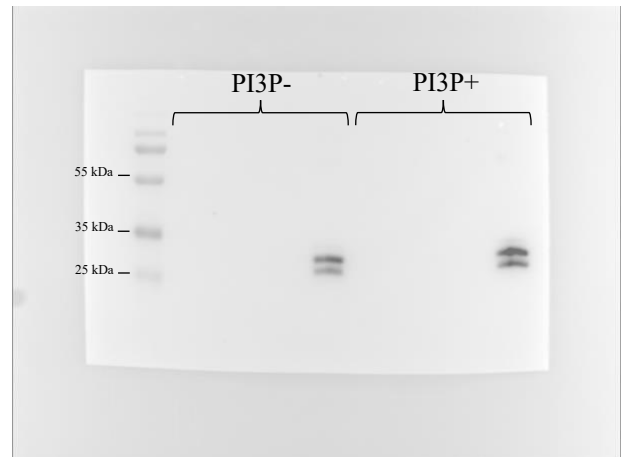

Panel G, His-VP3ΔCt
