# Supplementary material for: On the role of VP3-PI3P interaction in birnavirus endosomal membrane targeting
Source: eLife journal article supplement (doi:10.7554/elife.97261), 2024-04-26
Supplement: fig1-figsupp1-data1 [file elife-97261-fig1-figsupp1-data1-v1.pdf]

**Figure 1—figure supplement 1- Source Data 1.** Original Coomassie R. Blue-stained polyacrylamide gel and Western blot membranes corresponding to Figure S1, panel B and C.

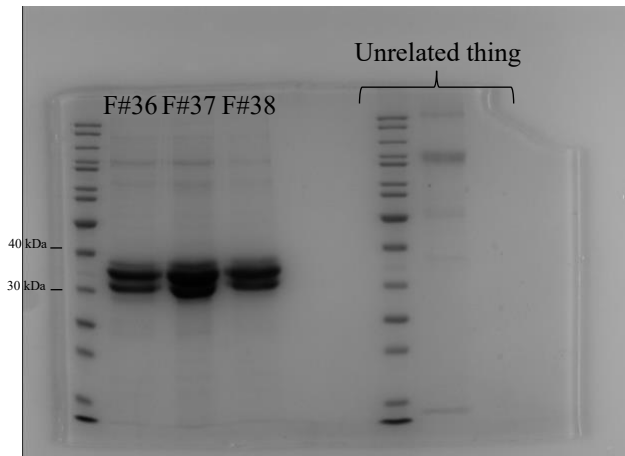

Panel B, Coomassie R. blue-stained polyacrylamide gel showing fractions (F) #36, #37 and #38 from the size exclusion chromatography of **His-VP3 FL** protein. The PageRuler Unstained Protein Ladder from Thermo Fisher Scientific (Product #26614) was used.

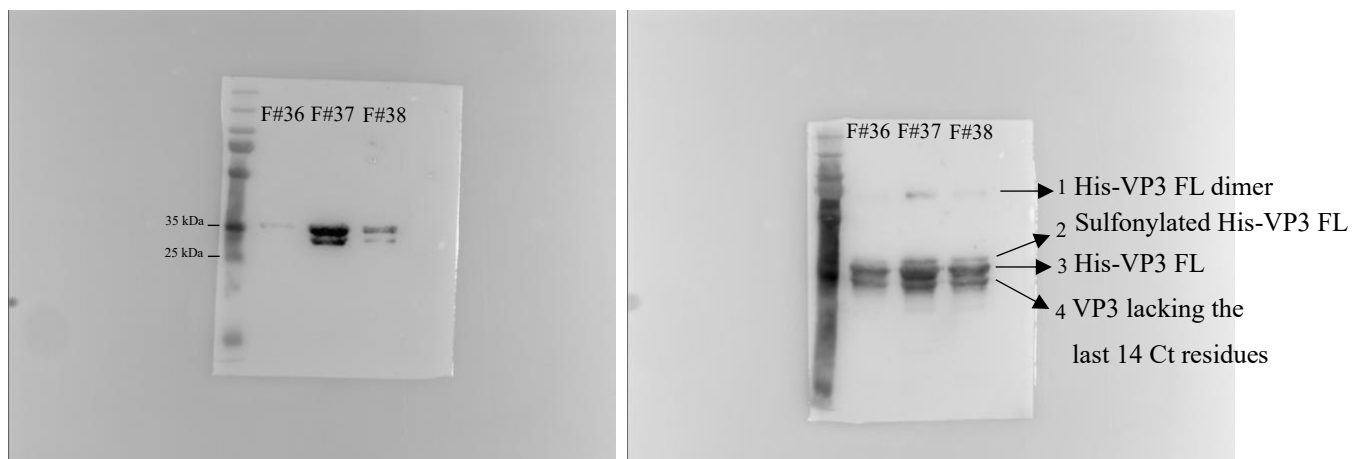

Panel C, Western blot images (left: anti-His; right: anti-VP3) from gels identical to that shown in (B). Numbers 1 to 4 indicate the identified proteins by mass spectrometry. In these cases, the Page Ruler Plus Prestained Protein Ladder from Thermo Fisher Scientific (Product #26619) was used.
