# Supplementary material for: On the role of VP3-PI3P interaction in birnavirus endosomal membrane targeting
Source: eLife journal article supplement (doi:10.7554/elife.97261), 2024-04-26
Supplement: fig4-data1 [file elife-97261-fig4-data1-v1.pdf]

**Figure 4 - Source Data 1.** Original membranes corresponding to Figure 4, panel A. In both cases, the Page Ruler Plus Prestained Protein Ladder from Thermo Fisher Scientific (Product #26619) was used.

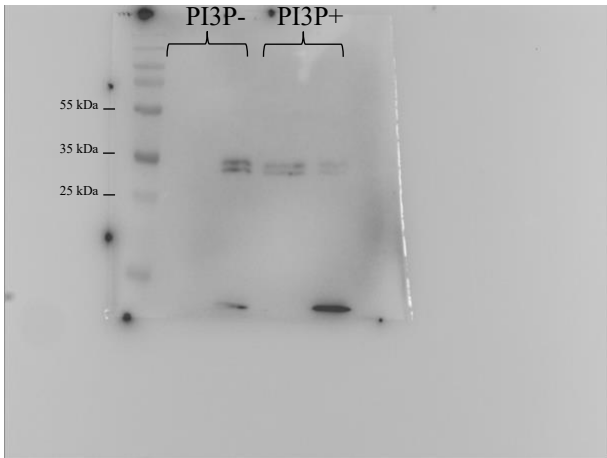

Panel A, **His-2xFYVE**

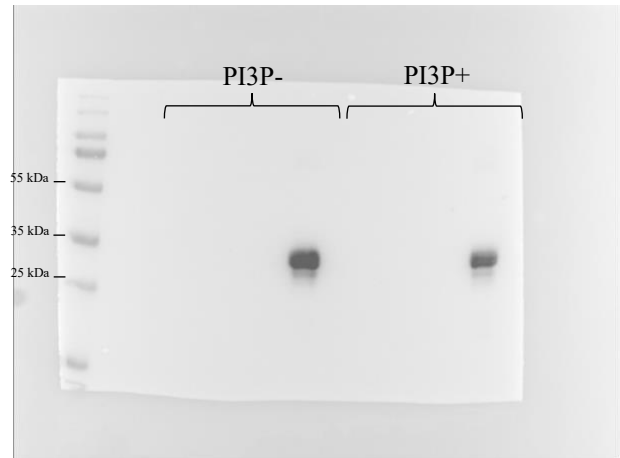

Panel A, **His-VP3 FL R200D**
