# Supplementary material for: On the role of VP3-PI3P interaction in birnavirus endosomal membrane targeting
Source: eLife journal article supplement (doi:10.7554/elife.97261), 2024-04-26
Supplement: fig5-figsupp1-data1 [file elife-97261-fig5-figsupp1-data1-v1.pdf]

**Figure 5—figure supplement 1 - Source Data 1.** Original Western blot membranes corresponding to Figure 5—figure supplement 1, panel A. We used the Page Ruler Plus Prestained Protein Ladder from Thermo Fisher Scientific (Product #26619) in the membranes. The membranes do not include the protein ladder, due to having observed that, sometimes, the anti-VP3 sera cross-reacted with certain bands from the ladder. This explains why in Figure 5—figure supplement 1, the ladder is

shown

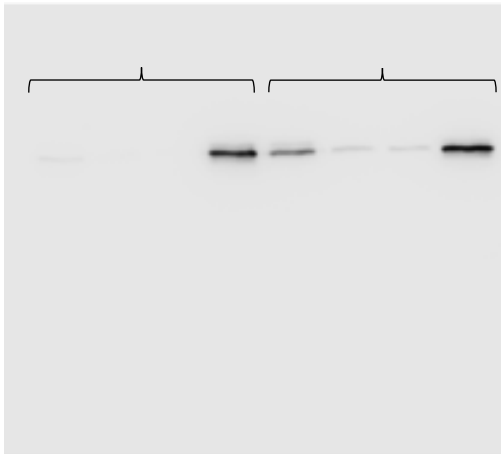

separately.

PI3P-

PI3P+

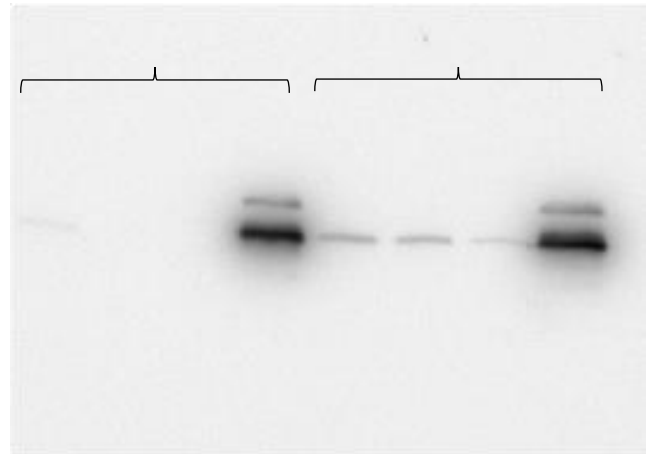

PI3P-

PI3P+

Panel A, left membrane, **His-VP3 FL**

Panel A, right membrane, **His-VP3 ΔNt**
